# Supplementary material
Source: Springer Nature journal article supplement (https://www.springermedizin.de/resource/supplementary/12992_2013_269_MOESM1_ESM.pdf/9616214)

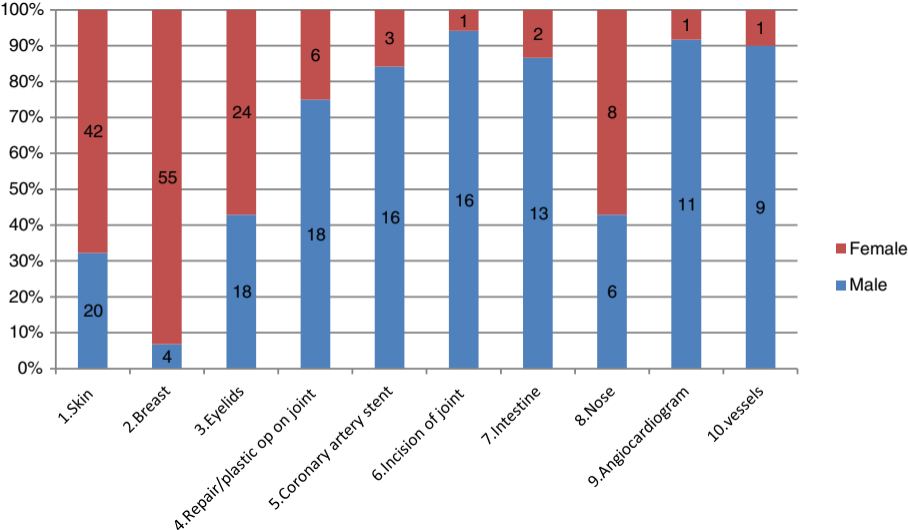

Supplement: MOESM1 [file 9616214]
